# Supplementary material
Source: PubMed Central journal article supplement (PMC9376797)
Supplement: NIHMS1822883-supplement-Hydroxycholesterol_Supp.pdf [file NIHMS1822883-supplement-Hydroxycholesterol_Supp.pdf]

| LNP     | Encapsulation Efficiency (%) | Z-Average Size (nm) | PDI         | Zeta Potential (mV) | pKa  |
|---------|------------------------------|---------------------|-------------|---------------------|------|
| S2      | 91                           | 90.6 ± 29.31        | 0.19 ± 0.07 | -4.36 ± 3.73        | 5.9  |
| A1-12.5 | 96                           | 59.35 ± 7.43        | 0.2 ± 0.03  | -6.9 ± 0.8          | 5.92 |
| A2-12.5 | 96                           | 84.88 ± 4.61        | 0.08 ± 0.07 | -17.33 ± 2.46       | 5.79 |
| A3-12.5 | 96                           | 82.05 ± 2.34        | 0.17 ± 0.04 | -5.75 ± 2.88        | 6.02 |
| B1-12.5 | 95                           | 61.03 ± 1.18        | 0.26 ± 0.02 | -16.57 ± 2.48       | 5.97 |
| B2-12.5 | 95                           | 86.95 ± 3.91        | 0.07 ± 0.05 | -8.48 ± 1.67        | 5.79 |
| B3-12.5 | 95                           | 77.52 ± 5.98        | 0.28 ± 0.02 | -3.84 ± 1.21        | 6.17 |
| A1-25   | 90                           | 84.44 ± 16.88       | 0.19 ± 0.09 | -8.82 ± 3.86        | 6.19 |
| A2-25   | 91                           | 78.52 ± 18.28       | 0.25 ± 0.04 | -16.89 ± 10.8       | 6.03 |
| A3-25   | 94                           | 68.52 ± 1.79        | 0.22 ± 0.04 | -10.75 ± 5.35       | 6.12 |
| B1-25   | 95                           | 95.1 ± 15.12        | 0.23 ± 0.03 | -9.33 ± 1.07        | 5.91 |
| B2-25   | 95                           | 62.44 ± 2.66        | 0.25 ± 0.05 | -10.18 ± 1.24       | 6.05 |
| B3-25   | 94                           | 75.39 ± 2.09        | 0.29 ± 0.03 | -7.07 ± 0.25        | 6.08 |
| A1-50   | 95                           | 102.15 ± 16.97      | 0.23 ± 0.08 | -2.36 ± 0.43        | 6.48 |
| A2-50   | 95                           | 115.68 ± 24.44      | 0.17 ± 0.12 | -4.2 ± 0.36         | 6.16 |
| A3-50   | 95                           | 103.12 ± 7.73       | 0.18 ± 0.01 | -9 ± 0.63           | 6.43 |
| B1-50   | 96                           | 97.6 ± 22.94        | 0.21 ± 0.03 | -16.23 ± 1.08       | 6.12 |
| B2-50   | 95                           | 100.07 ± 6.55       | 0.36 ± 0.09 | -9.68 ± 1.55        | 6.7  |
| B3-50   | 95                           | 138.7 ± 35.24       | 0.31 ± 0.07 | -4.83 ± 0.88        | 6.2  |
| A1-100  | 92                           | 88.08 ± 10.05       | 0.22 ± 0.06 | 1.67 ± 1.13         | 6.44 |
| A2-100  | 88                           | 89.45 ± 13.88       | 0.19 ± 0.05 | -2.46 ± 0.27        | 6.25 |
| A3-100  | 91                           | 81.79 ± 9.16        | 0.19 ± 0.07 | -3.58 ± 3.7         | 5.73 |
| B1-100  | 92                           | 85.72 ± 6.89        | 0.17 ± 0.06 | -4.55 ± 1.04        | 5.5  |
| B2-100  | 92                           | 137.02 ± 69.77      | 0.21 ± 0.09 | -8.02 ± 0.16        | 5.68 |
| B3-100  | 88                           | 225.48 ±<br>157.36  | 0.3 ± 0.2   | -14.9 ± 2.9         | 5.97 |

**Supplemental Table 1.** LNP library characterization data. Encapsulation efficiency, z-average size/diameter, PDI, zeta potential, and pKa for all LNPs in the library.

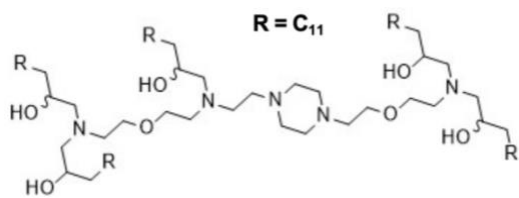

**Supplemental Figure 1.** Chemical structure of the C14-4 ionizable lipid.

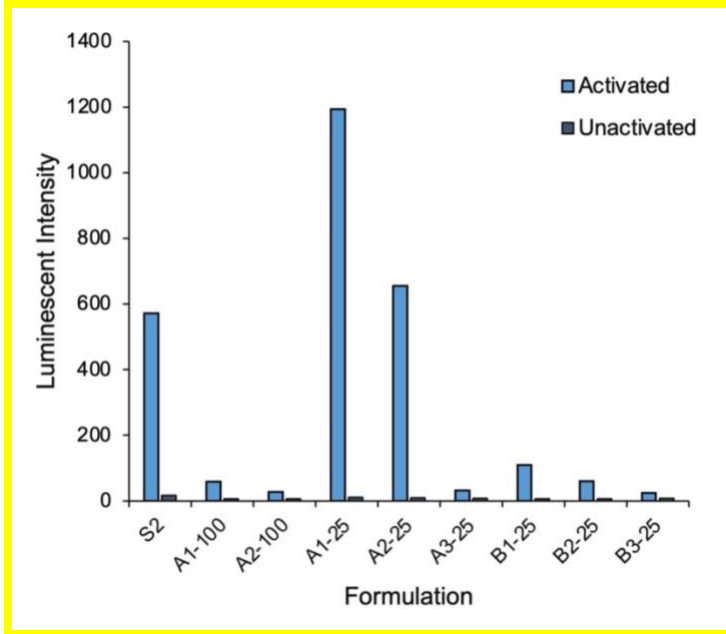

**Supplemental Figure 2.** Luciferase expression in activated and unactivated primary T cells treated with luciferase-encoding mRNA LNPs with varying cholesterol substitutions. Primary human T cells were treated with various particles from the library (S2, A1-100, A2-100, A2-25, A3-25, B1-25, B2-25, B3-25) at a dose of 300 ng mRNA / 60,000 cells for 24 h. n = 1.

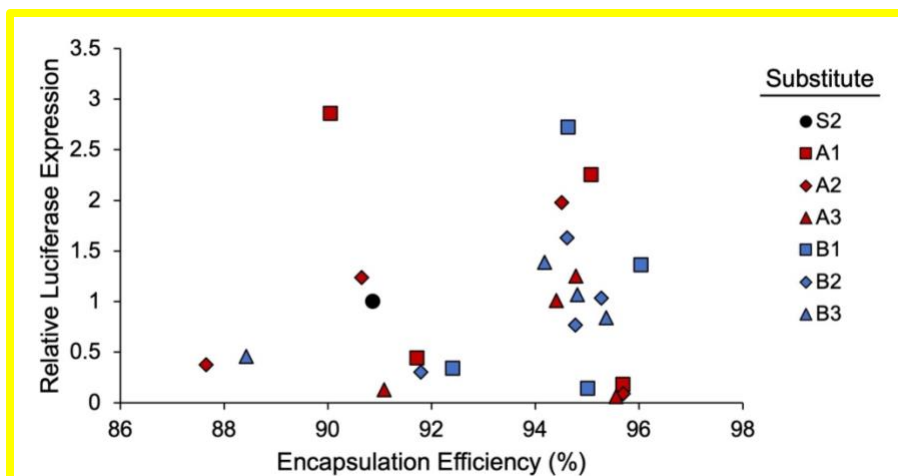

**Supplemental Figure 3.** Relationship between relative luciferase expression in Jurkats (immortalized T cells) and mRNA encapsulation efficiency of hydroxycholesterol-substituted LNPs and a control LNP. Replicate-averaged data from the in vitro screen described in the main text is plotted in this figure as relative luciferase expression versus mRNA encapsulation efficiency (%) to demonstrate no significant relationship between the two variables or hydroxycholesterol substitute. No correlation was found between the two variables in a t-test for linear regression ( $p = 0.689 \gg 0.05$ ).
